# Supplementary material for: Triphenylamine-containing imine-linked porous organic network for luminescent detection and adsorption of Cr(vi) in water
Source: Royal Society of Chemistry journal article supplement (doi:10.1039/d2dt01046a), 2022-01-01
Supplement: d2dt01046a1.pdf [file d2dt01046a1.pdf]

Supporting Information for

**Triphenylamine-Containing Imine-linked Porous Organic Network for  
Luminescent Detection and Adsorption of Cr(VI) in Water**

Man Wang,<sup>a</sup> Han-Shu Li,<sup>a</sup> Xin Ding,<sup>a</sup> Lizan Jiang,<sup>a</sup> Pengyan Wu,<sup>\*a</sup> Ruiting Zheng,<sup>a</sup> Guoyue  
Bao,<sup>a</sup> Guoliang Liu<sup>\*b</sup> and Jian Wang<sup>\*a</sup>

<sup>a</sup>School of Chemistry and Materials Science & Jiangsu Key Laboratory of Green Synthetic  
Chemistry for Functional Materials, Jiangsu Normal University, Xuzhou 221116, China.

<sup>b</sup>State Key Laboratory of Materials-Oriented Chemical Engineering, College of Chemical  
Engineering, Nanjing Tech University, Nanjing 211816, China.

E-mail: [wpyan@jsnu.edu.cn](mailto:wpyan@jsnu.edu.cn); [glliu@njtech.edu.cn](mailto:glliu@njtech.edu.cn); [wjian@jsnu.edu.cn](mailto:wjian@jsnu.edu.cn)

## 1. Materials and Methods.

**Reagents and chemicals:** All reagents and solvents were of AR grade and used without further purification unless otherwise noted. 1,2-Diphenylethylenediamine (DPEA) and tris(4-formylphenyl)amine (TFPA) were purchased from Alfa Aesar. Anion salts ( $K_2Cr_2O_7$ ,  $K_2CrO_4$ ,  $K_2CO_3$ ,  $KHCO_3$ ,  $K_2S$ ,  $K_2SO_4$ ,  $KNO_3$ ,  $KF$ ,  $KCl$ ,  $KBr$ ,  $KI$ ,  $K_3PO_4$ ,  $KMnO_4$ ,  $K_2HPO_4$ ,  $KH_2PO_4$  and  $K_4P_2O_7$ ) were purchased from J&K Scientific. Stock solution ( $2 \times 10^{-2}$  M) of the anion salts were prepared in water for further experiments.

**Instruments and spectroscopic measurements:** The elemental analyses of C, H and N were performed on a Vario EL III elemental analyzer. Solid-state nuclear magnetic resonance (NMR) data were collected on a Bruker Avance 400 MHz NMR spectrometer (DRX400) with cross-polarization magic-angle spinning (CP/MAS). X-Ray powder diffraction (XRD) patterns of the PON-1 was recorded on a Rigaku D/max-2400 X-ray powder diffractometer (Japan) using  $Cu-K\alpha$  ( $\lambda = 1.5405 \text{ \AA}$ ) radiation. X-ray photoelectron spectroscopy (XPS) experiments were performed with a PHI QUANTUM2000 surface analysis instrument. The morphologies of the prepared samples were recorded by a Field Emission Scanning Electron Microscopy (SEM) of Hitachi SU8010. Samples were treated *via* Pt sputtering for 90 s before observation. Transmission electron microscopy (TEM) was conducted on a FEI-Tecnai G2 transmission electron microscope. FT-IR spectra were recorded as KBr pellets on JASCO FT/IR-430. Thermogravimetric analysis (TGA) was carried out at a ramp rate of  $5 \text{ }^\circ\text{C}/\text{min}$  in a nitrogen flow with a Mettler-Toledo TGA/SDTA851 instrument. Fluorescence spectra of the solution were obtained using the FP6500 spectrometer (JASCO). Both excitation and emission slit widths were

2.5 nm. Fluorescence measurements were carried out in a 1 cm quartzcuvette with stirring the suspension of PON-1.

**Synthesis of PON-1:** A 10 mL Pyrex tube was charged with 1,2-Diphenylethylenediamine (DPEA) (15.9 mg, 0.075 mmol), tris(4-formylphenyl)amine (TFPA) (16.5 mg, 0.05 mmol), mesitylene/dioxane (1:1 v/v, 3 mL), and aqueous acetic acid (6 M, 0.5 mL). The mixture was sonicated for 15 min to get a homogeneous dispersion. The tube was then flash frozen at 77 K with a liquid N<sub>2</sub> bath and degassed by three freeze-pump-thaw cycles, sealed under vacuum, and heated at 120 °C for 3 days. The brown precipitate was collected by centrifugation and washed with anhydrous acetone, anhydrous tetrahydrofuran, and anhydrous ethanol, separately. The collected powder was then activated by solvent exchange with anhydrous methanol 3 times and air dried to give a pale brown powder with 80% isolated yield and a molecular formula of (C<sub>84</sub>H<sub>66</sub>N<sub>8</sub>)<sub>n</sub> (% calcd/found: C 84.96/84.85, H 5.60/5.56, N 9.44/9.45).

**Table S1.** The proposed model was geometry-optimized using the MS Forcite molecular dynamics module (universal force fields, Ewald summations) to obtain the optimized lattice parameters, see below:

|                   | PON-1                                          |                                                   |
|-------------------|------------------------------------------------|---------------------------------------------------|
| Empirical formula | C <sub>84</sub> H <sub>66</sub> N <sub>8</sub> | C <sub>162</sub> H <sub>126</sub> N <sub>16</sub> |
| Formula wt        | 1187.4768                                      | 2296.8417                                         |
| Stacking method   | slipped-AA                                     | slipped-AB                                        |
| Crystal System    | Triclinic                                      | Triclinic                                         |
| Space Group       | <i>P1</i>                                      | <i>P1</i>                                         |
| <i>a</i> (Å)      | 29.1225                                        | 29.1225                                           |
| <i>b</i> (Å)      | 28.7659                                        | 28.7659                                           |
| <i>c</i> (Å)      | 3.6000                                         | 7.2000                                            |
| $\alpha$ (°)      | 90.00                                          | 90.00                                             |
| $\beta$ (°)       | 90.00                                          | 90.00                                             |
| $\gamma$ (°)      | 120.00                                         | 120.00                                            |

**Table S2.** Atomic coordinates of the AA-stacking mode of PON-1.

| Atom site label | Atom site fract x | Atom site fract y | Atom site fract z | Atom site label | Atom site fract x | Atom site fract y | Atom site fract z |
|-----------------|-------------------|-------------------|-------------------|-----------------|-------------------|-------------------|-------------------|
| C1              | 1.48579           | -1.50434          | -0.44284          | C24             | 1.36301           | -1.37558          | -0.67509          |
| C2              | 1.51671           | -1.44244          | -0.55717          | C25             | 1.40095           | -1.39160          | -0.66053          |
| N3              | 1.51723           | -1.52948          | -0.54376          | C26             | 1.53856           | -1.64078          | -0.59609          |
| C4              | 1.42647           | -1.53663          | -0.55412          | C27             | 1.57751           | -1.65562          | -0.59962          |
| N5              | 1.48527           | -1.41730          | -0.45625          | C28             | 1.62927           | -1.62180          | -0.45820          |
| C6              | 1.57603           | -1.41015          | -0.44589          | C29             | 1.63949           | -1.57120          | -0.32491          |
| C7              | 1.39076           | -1.52043          | -0.42350          | C30             | 1.60155           | -1.55518          | -0.33948          |
| C8              | 1.33655           | -1.55020          | -0.50105          | N31             | 1.33241           | -1.30855          | -0.55176          |
| C9              | 1.31579           | -1.59913          | -0.68539          | C32             | 1.27542           | -1.34979          | -0.54631          |
| C10             | 1.34947           | -1.61767          | -0.79948          | C33             | 1.34838           | -1.25090          | -0.55429          |
| C11             | 1.40406           | -1.58673          | -0.73750          | N34             | 1.67009           | -1.63823          | -0.44824          |
| C12             | 1.61174           | -1.42635          | -0.57651          | C35             | 1.72708           | -1.59699          | -0.45368          |
| C13             | 1.66595           | -1.39658          | -0.49896          | C36             | 1.65412           | -1.69588          | -0.44571          |
| C14             | 1.68671           | -1.34765          | -0.31462          | C37             | 1.60512           | -1.73564          | -0.29722          |
| C15             | 1.65303           | -1.32911          | -0.20054          | C38             | 1.58781           | -1.79036          | -0.32658          |
| C16             | 1.59845           | -1.36005          | -0.26252          | C39             | 1.62014           | -1.80777          | -0.48786          |
| C17             | 1.49353           | -1.37072          | -0.56516          | C40             | 1.67006           | -1.76942          | -0.61755          |
| C18             | 1.45186           | -1.35664          | -0.52877          | C41             | 1.68639           | -1.71485          | -0.59991          |
| C19             | 1.50897           | -1.57606          | -0.43485          | C42             | 1.76645           | -1.60658          | -0.30347          |
| C20             | 1.55064           | -1.59014          | -0.47124          | C43             | 1.82047           | -1.56925          | -0.33274          |
| C21             | 1.46394           | -1.30600          | -0.40391          | C44             | 1.83753           | -1.51930          | -0.49687          |

|     |         |          |          |     |         |          |          |
|-----|---------|----------|----------|-----|---------|----------|----------|
| C22 | 1.42499 | -1.29116 | -0.40038 | C45 | 1.79955 | -1.50773 | -0.63405 |
| C23 | 1.37323 | -1.32498 | -0.54180 | C46 | 1.74572 | -1.54604 | -0.61823 |
| C47 | 1.23605 | -1.34020 | -0.69653 | C73 | 0.92817 | -1.66156 | -0.73896 |
| C48 | 1.18203 | -1.37753 | -0.66726 | C74 | 0.97760 | -1.63896 | -0.56809 |
| C49 | 1.16497 | -1.42748 | -0.50313 | C75 | 1.00558 | -1.58411 | -0.48654 |
| C50 | 1.20295 | -1.43905 | -0.36595 | C76 | 1.46734 | -0.90738 | -0.77062 |
| C51 | 1.25678 | -1.40074 | -0.38177 | C77 | 1.44174 | -0.87812 | -0.83978 |
| C52 | 1.39738 | -1.21114 | -0.70277 | C78 | 1.38898 | -0.89880 | -0.73729 |
| C53 | 1.41469 | -1.15642 | -0.67342 | C79 | 1.36174 | -0.94885 | -0.56660 |
| C54 | 1.38236 | -1.13901 | -0.51214 | C80 | 1.38778 | -0.97735 | -0.48555 |
| C55 | 1.33244 | -1.17736 | -0.38244 | C81 | 1.56103 | -1.98958 | -0.41591 |
| C56 | 1.31611 | -1.23193 | -0.40009 | C82 | 2.01700 | -1.39674 | -0.41536 |
| C57 | 1.40232 | -1.08203 | -0.42598 | C83 | 1.53517 | -2.03940 | -0.22937 |
| N58 | 1.44306 | -1.04323 | -0.59460 | C84 | 1.56076 | -2.06866 | -0.16022 |
| C59 | 1.47042 | -0.98737 | -0.46062 | C85 | 1.61352 | -2.04798 | -0.26270 |
| C60 | 1.10862 | -1.46457 | -0.42086 | C86 | 1.64076 | -1.99793 | -0.43340 |
| N61 | 1.07037 | -1.46226 | -0.59198 | C87 | 1.61472 | -1.96943 | -0.51445 |
| C62 | 1.01510 | -1.49059 | -0.46025 | C88 | 2.06617 | -1.37299 | -0.22833 |
| C63 | 1.89388 | -1.48221 | -0.57913 | C89 | 2.09491 | -1.31783 | -0.15869 |
| N64 | 1.93213 | -1.48452 | -0.40802 | C90 | 2.07433 | -1.28522 | -0.26103 |
| C65 | 1.98740 | -1.45619 | -0.53974 | C91 | 2.02490 | -1.30782 | -0.43191 |
| C66 | 1.60018 | -1.86475 | -0.57401 | C92 | 1.99692 | -1.36267 | -0.51345 |
| N67 | 1.55944 | -1.90355 | -0.40539 | H93 | 1.48355 | -1.50719 | -0.14598 |
| C68 | 1.53208 | -1.95941 | -0.53938 | H94 | 1.51895 | -1.43958 | -0.85403 |

|      |         |          |          |      |         |          |          |
|------|---------|----------|----------|------|---------|----------|----------|
| C69  | 0.98550 | -1.55004 | -0.58463 | H95  | 1.40348 | -1.48647 | -0.24146 |
| C70  | 1.44147 | -0.95720 | -0.58408 | H96  | 1.31027 | -1.53647 | -0.40161 |
| C71  | 0.93633 | -1.57378 | -0.77166 | H97  | 1.27361 | -1.62287 | -0.73704 |
| C72  | 0.90759 | -1.62895 | -0.84130 | H98  | 1.33337 | -1.65594 | -0.93997 |
| H99  | 1.42776 | -1.60325 | -0.82978 | H125 | 1.19085 | -1.47707 | -0.23002 |
| H100 | 1.59902 | -1.46031 | -0.75855 | H126 | 1.28307 | -1.41193 | -0.25968 |
| H101 | 1.69223 | -1.41032 | -0.59840 | H127 | 1.42447 | -1.22116 | -0.82561 |
| H102 | 1.72889 | -1.32391 | -0.26297 | H128 | 1.45424 | -1.12794 | -0.76349 |
| H103 | 1.66914 | -1.29084 | -0.06004 | H129 | 1.30670 | -1.16502 | -0.25212 |
| H104 | 1.57474 | -1.34353 | -0.17024 | H130 | 1.27792 | -1.25839 | -0.28908 |
| H105 | 1.52917 | -1.34316 | -0.71005 | H131 | 1.38538 | -1.07375 | -0.18629 |
| H106 | 1.47333 | -1.60362 | -0.28997 | H132 | 1.46645 | -0.98920 | -0.16289 |
| H107 | 1.50352 | -1.27793 | -0.30618 | H133 | 1.10025 | -1.49009 | -0.18146 |
| H108 | 1.43734 | -1.25204 | -0.29709 | H134 | 1.01672 | -1.49288 | -0.16251 |
| H109 | 1.32560 | -1.40416 | -0.78825 | H135 | 1.90225 | -1.45669 | -0.81853 |
| H110 | 1.39116 | -1.43048 | -0.77082 | H136 | 1.98578 | -1.45390 | -0.83749 |
| H111 | 1.49898 | -1.66885 | -0.69383 | H137 | 1.61712 | -1.87303 | -0.81370 |
| H112 | 1.56516 | -1.69474 | -0.70291 | H138 | 1.53605 | -1.95758 | -0.83711 |
| H113 | 1.67690 | -1.54262 | -0.21175 | H139 | 0.91996 | -1.55021 | -0.87204 |
| H114 | 1.61134 | -1.51630 | -0.22919 | H140 | 0.86966 | -1.64635 | -0.98097 |
| H115 | 1.57803 | -1.72562 | -0.17439 | H141 | 0.90613 | -1.70418 | -0.79635 |
| H116 | 1.54826 | -1.81884 | -0.23651 | H142 | 0.99367 | -1.66425 | -0.48832 |
| H117 | 1.69580 | -1.78176 | -0.74788 | H143 | 1.04203 | -1.56960 | -0.33561 |
| H118 | 1.72458 | -1.68839 | -0.71091 | H144 | 1.50700 | -0.89090 | -0.87055 |

|      |         |          |          |      |         |          |          |
|------|---------|----------|----------|------|---------|----------|----------|
| H119 | 1.75667 | -1.64387 | -0.17832 | H145 | 1.46259 | -0.83969 | -0.97902 |
| H120 | 1.84870 | -1.58046 | -0.23873 | H146 | 1.36903 | -0.87636 | -0.79427 |
| H121 | 1.81165 | -1.46971 | -0.76998 | H147 | 1.32072 | -0.96500 | -0.48654 |
| H122 | 1.71943 | -1.53485 | -0.74032 | H148 | 1.36561 | -1.01423 | -0.33450 |
| H123 | 1.24583 | -1.30291 | -0.82168 | H149 | 1.49550 | -2.05588 | -0.12945 |
| H124 | 1.15380 | -1.36632 | -0.76126 | H150 | 1.53991 | -2.10709 | -0.02097 |
| H151 | 1.63347 | -2.07042 | -0.20572 | H155 | 2.13284 | -1.30043 | -0.01902 |
| H152 | 1.68178 | -1.98179 | -0.51345 | H156 | 2.09637 | -1.24260 | -0.20364 |
| H153 | 1.63690 | -1.93255 | -0.66550 | H157 | 2.00883 | -1.28253 | -0.51167 |
| H154 | 2.08254 | -1.39657 | -0.12795 | H158 | 1.96047 | -1.37718 | -0.66438 |



**Figure S1.** Powder X-ray diffraction (PXRD) patterns of as-synthesized PON-1 and simulated PON-1 in different stacking models.

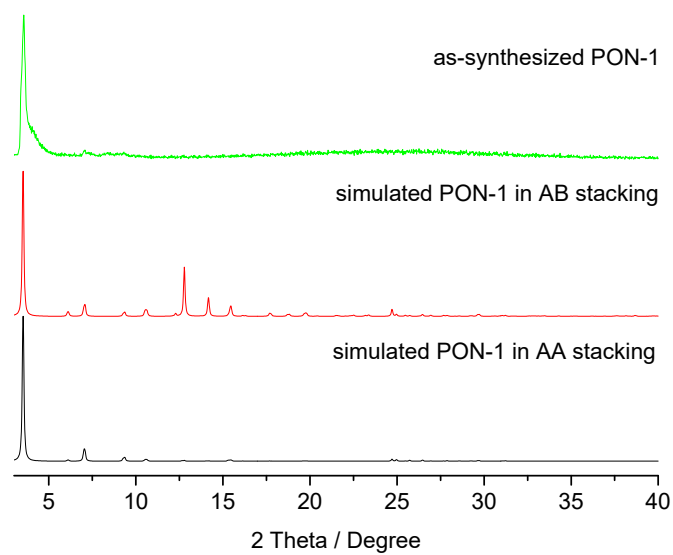

**Figure S2.**  $^{13}\text{C}$  NMR spectra of PON-1.

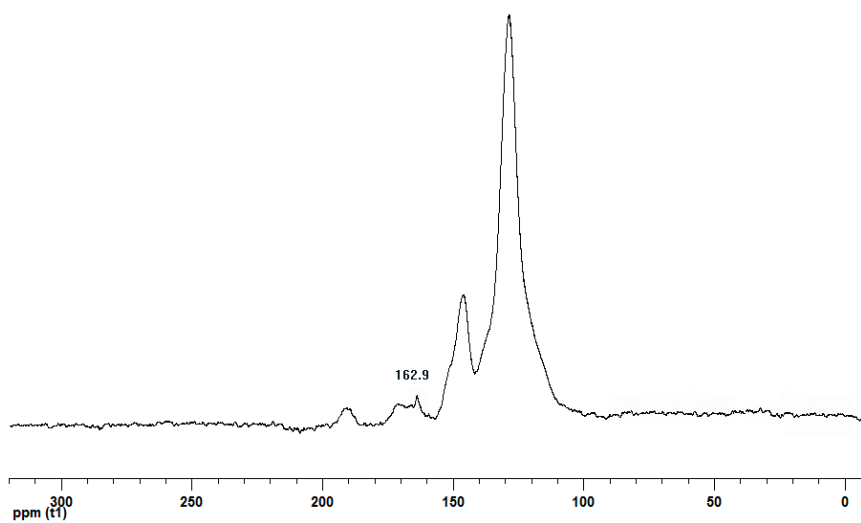

**Figure S3.** TGA traces of PON-1 ranging from room temperature to 600 °C.

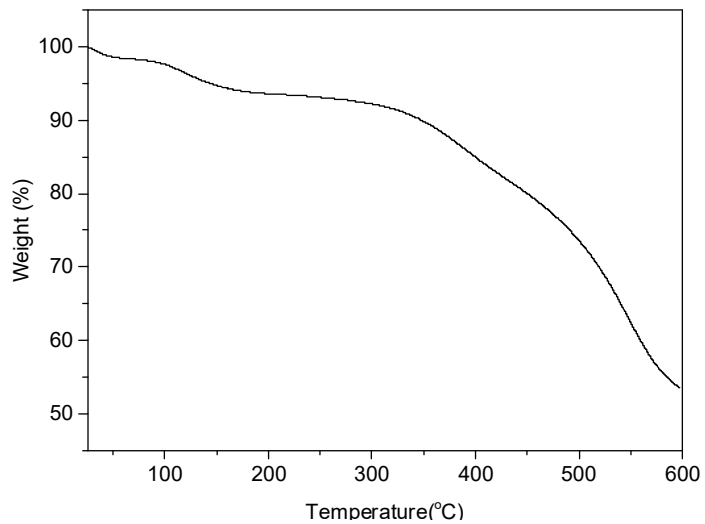

**Figure S4.** N<sub>2</sub> physisorption isotherms of PON-1.

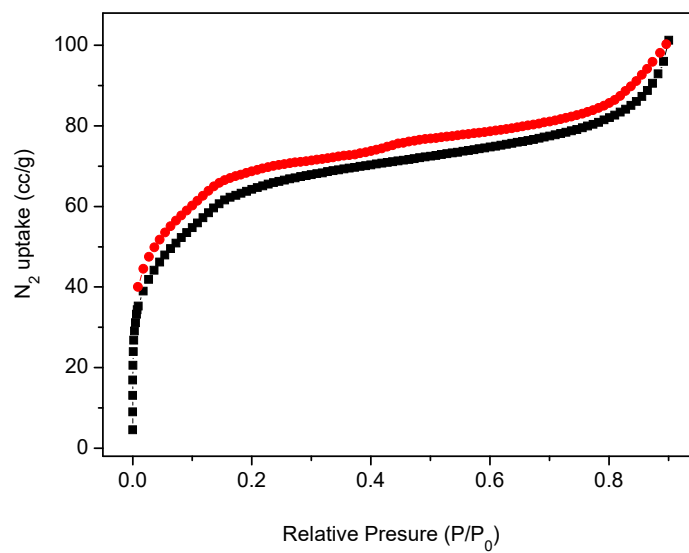

**Figure S5.** Pore size distribution of PON-1.

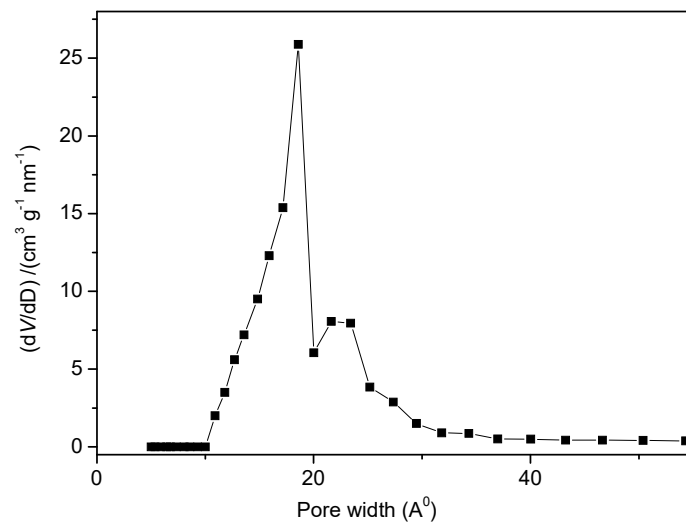

**Figure S6.** pH-dependent fluorescence of PON-1 in aqueous with the pH ranging from 4.0 to 11.0.

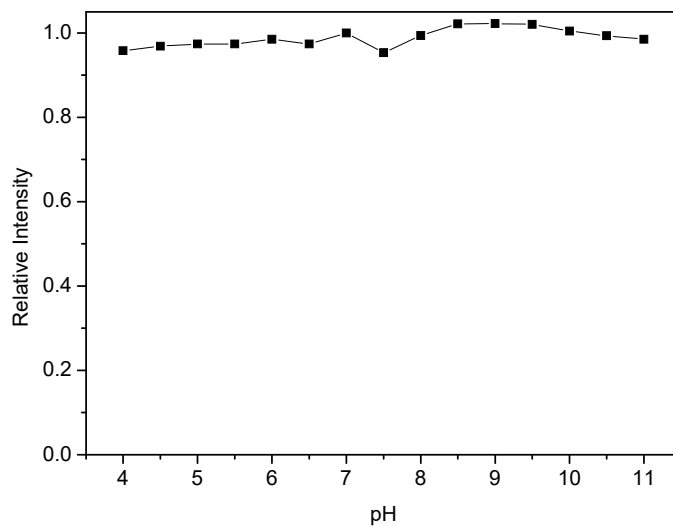

**Figure S7.** Families of various fluorescence spectra of PON-1 in water solution upon the addition of 2.98 mM of different selected anions.

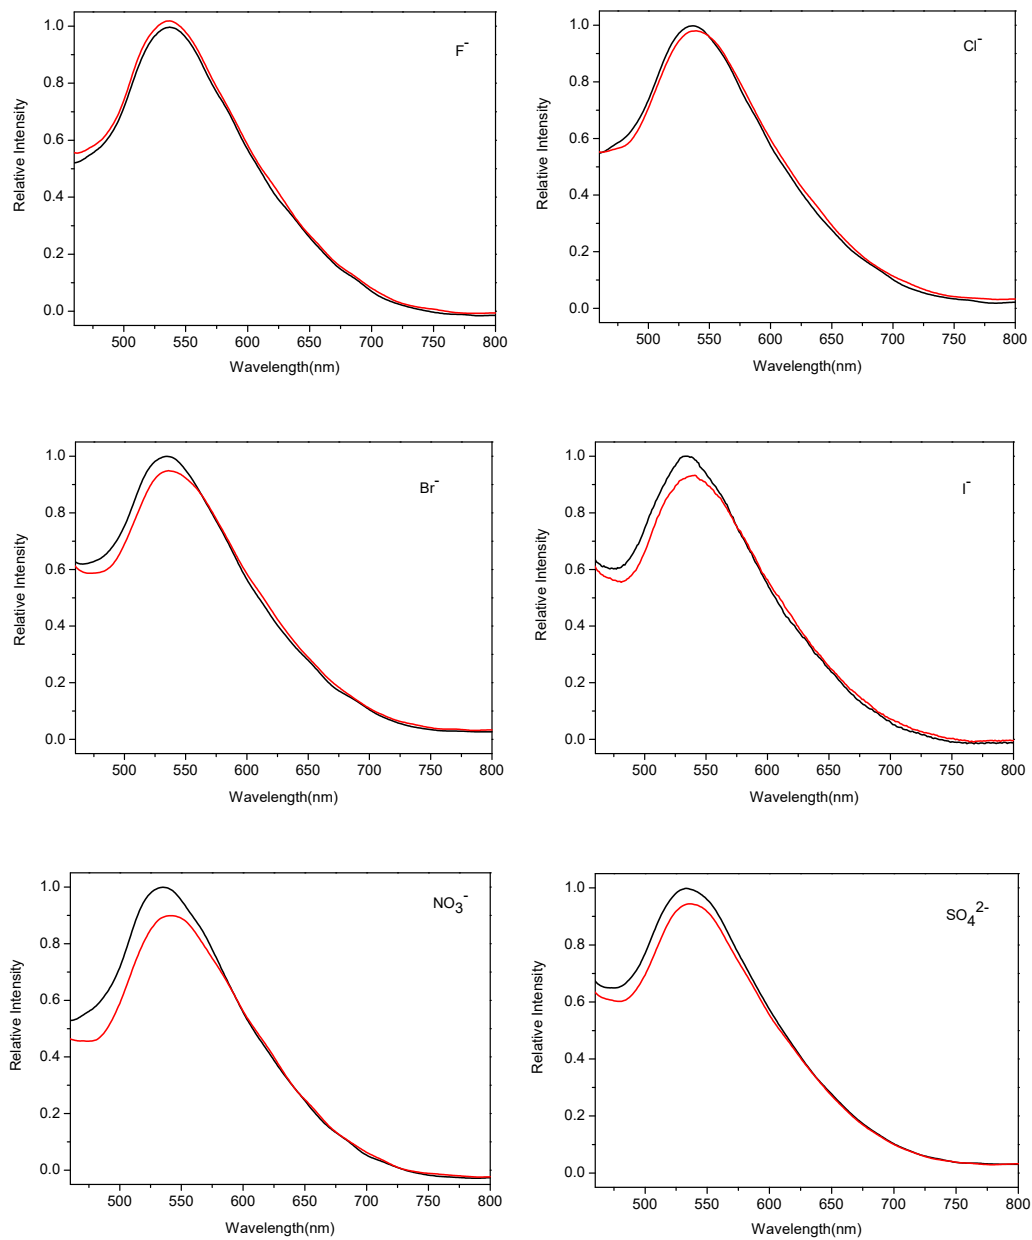

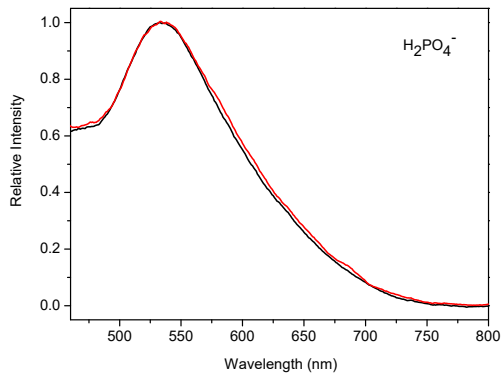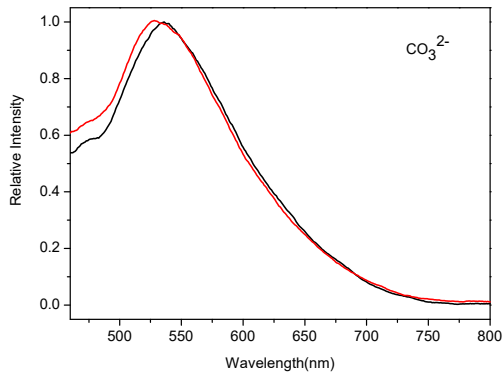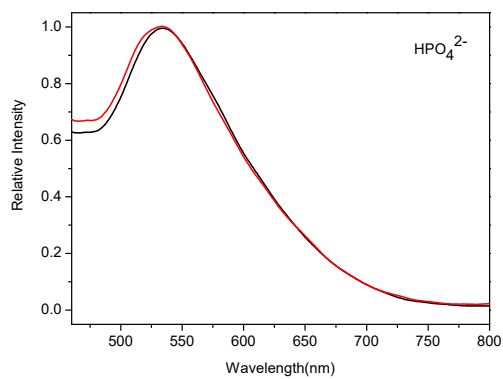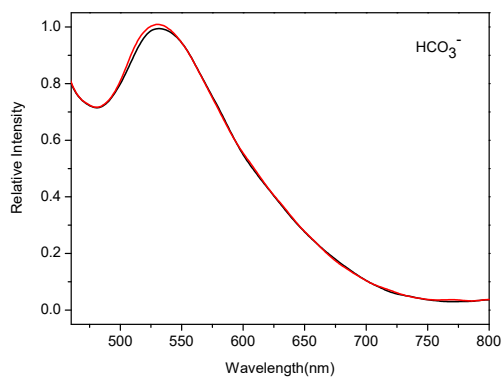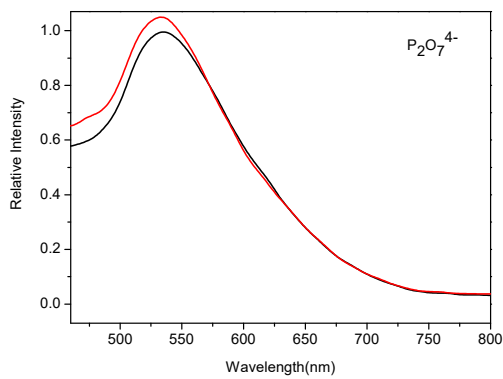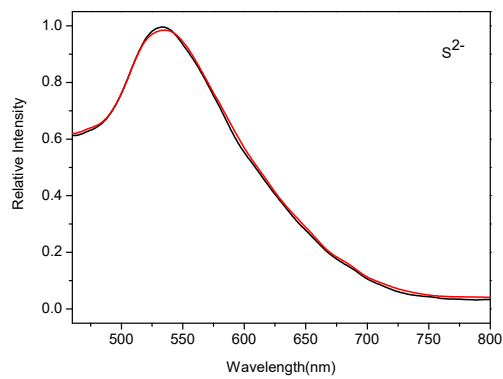

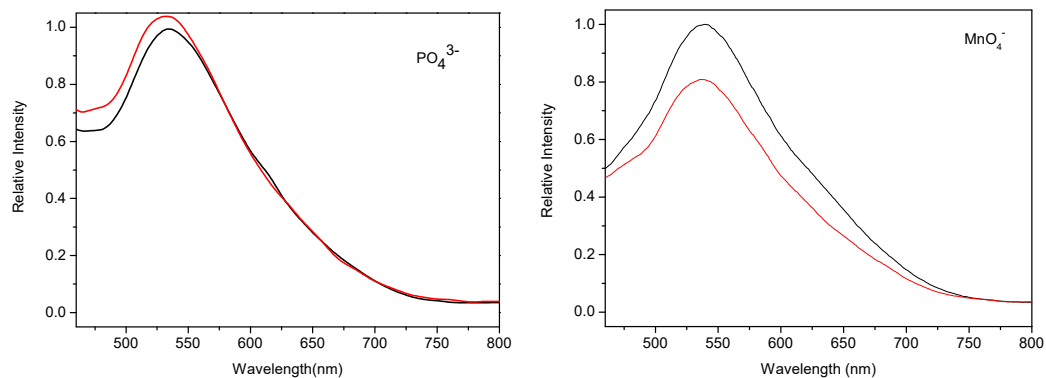

**Figure S8.** Fluorescence spectra of PON-1 as a function of the  $\text{CrO}_4^{2-}$  concentration (from 0.0 to 2.98 mM) in an aqueous solution with  $\lambda_{\text{ex}} = 420 \text{ nm}$ .

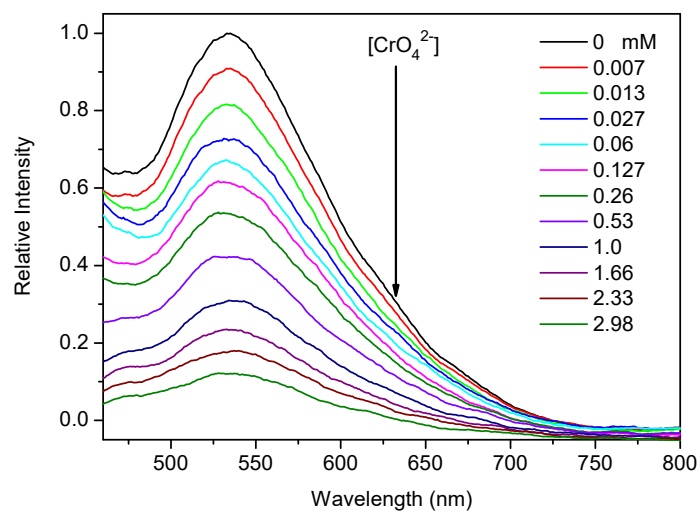

**Figure S9.** The Stern–Volmer plot of PON-1 quenched by  $\text{Cr}_2\text{O}_7^{2-}$  (top) and  $\text{CrO}_4^{2-}$  (bottom), where  $I_0$  and  $I$  are the fluorescence intensity before and after  $\text{Cr}_2\text{O}_7^{2-}$  or  $\text{CrO}_4^{2-}$  incorporation, respectively.

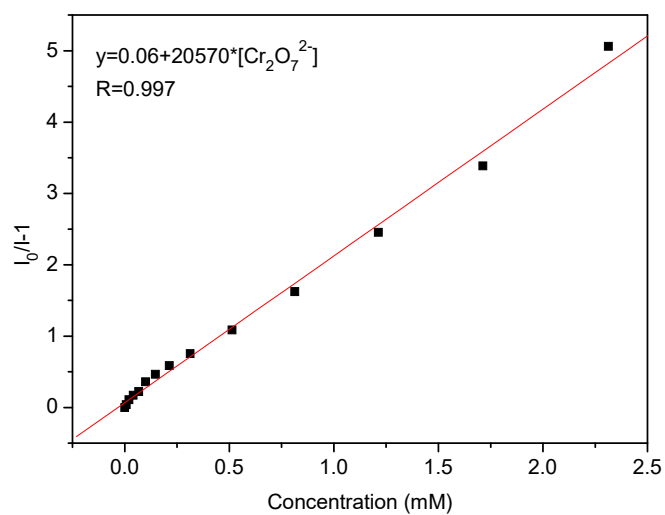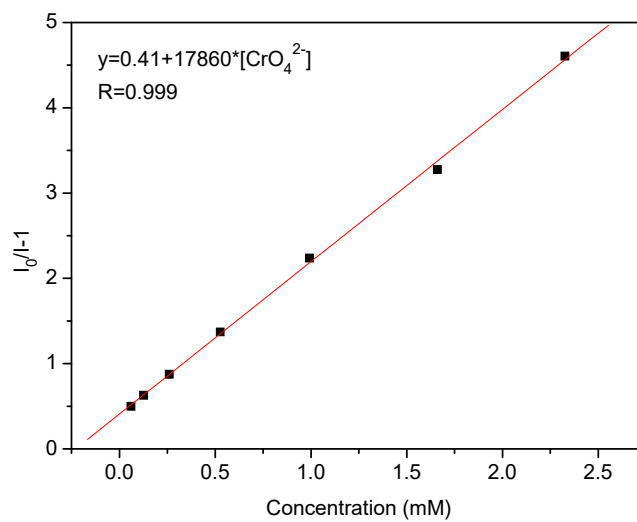

**Figure S10.** Plot of the relative fluorescence intensity of PON-1 as the concentration of  $\text{Cr}_2\text{O}_7^{2-}$  (left) and  $\text{CrO}_4^{2-}$  (right).

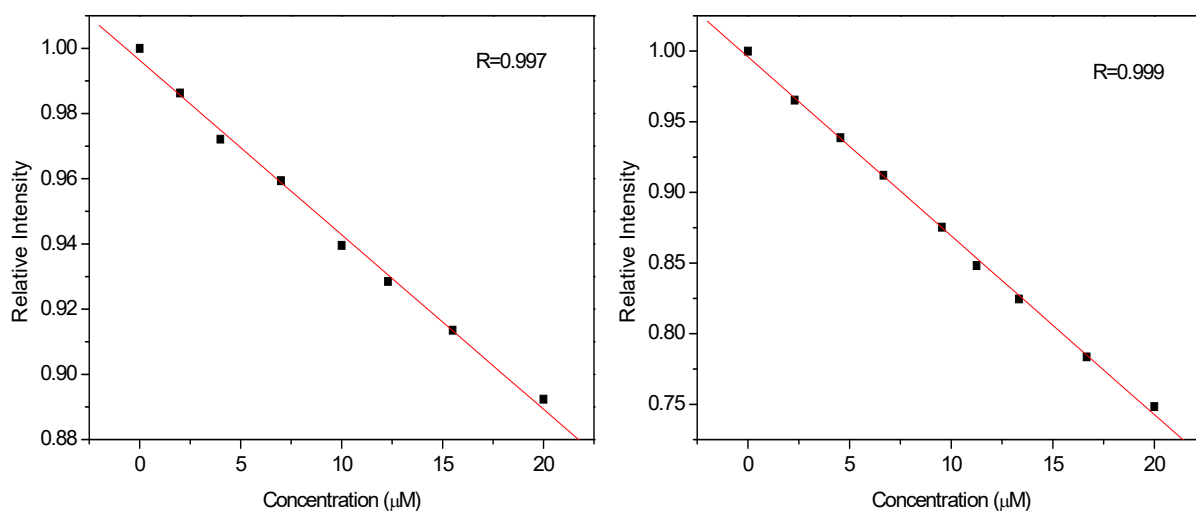

To determine the S/N ratio, the emission intensity of PON-1 without Cr(VI) was measured for 10 times and the standard deviation of blank measurements was determined. The detection limit is then calculated with the following equation:

$$\text{LOD} = K \times \delta / S$$

Where  $\delta$  is the standard deviation of blank measurements, S is the slope between intensity versus sample concentration.

$$\delta = \sqrt{\frac{\sum (F_0 - \bar{F})^2}{N-1}} = 0.331 \text{ (N=10)}; K = 3$$

The LOD for  $\text{Cr}_2\text{O}_7^{2-}$ : Linear Equation:  $y = 2.84 \times 10^6 \times x + 0.996$ ;  $R = 0.997$

$$\text{LOD} = K \times \delta / S = 3.5 \times 10^{-7} \text{ M}$$

The LOD for  $\text{CrO}_4^{2-}$ : Linear Equation:  $y = 2.48 \times 10^6 \times x + 0.983$ ;  $R = 0.999$

$$\text{LOD} = K \times \delta / S = 4.0 \times 10^{-7} \text{ M}$$



**Figure S11.** The fluorescence intensity of PON-1 with varying  $\text{CrO}_4^{2-}$  concentrations.

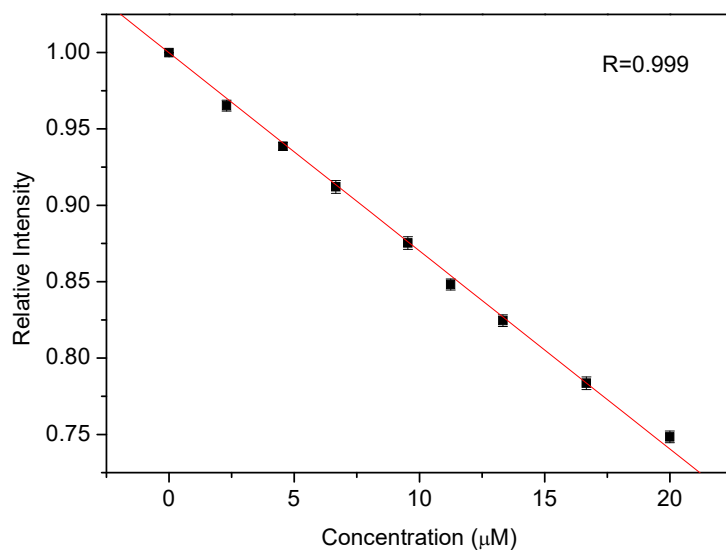

**Figure S12.** Fluorescence spectra of PON-1 with gradual addition of different concentrations of  $\text{Cr}_2\text{O}_7^{2-}$  (top) or  $\text{CrO}_4^{2-}$  (bottom) in HEPES buffer solutions.

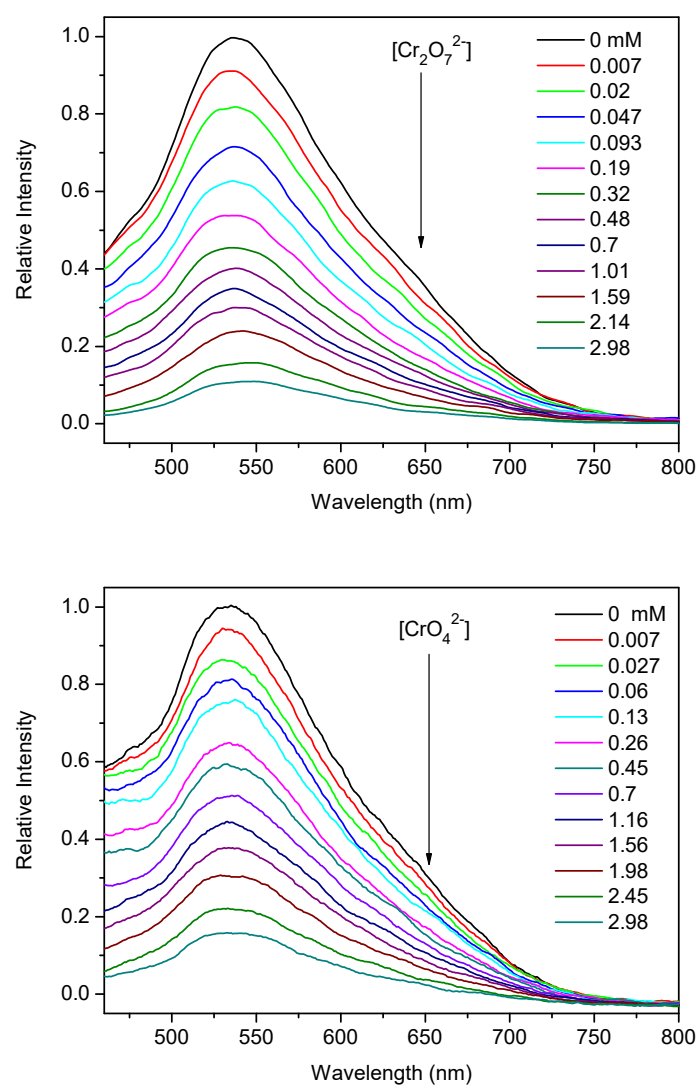

**Figure S13.** The Stern–Volmer plot of PON-1 quenched by  $\text{Cr}_2\text{O}_7^{2-}$  (top) and  $\text{CrO}_4^{2-}$  (bottom) in HEPES buffer solutions, where  $I_0$  and  $I$  are the fluorescence intensity before and after  $\text{Cr}_2\text{O}_7^{2-}$  or  $\text{CrO}_4^{2-}$  incorporation, respectively.

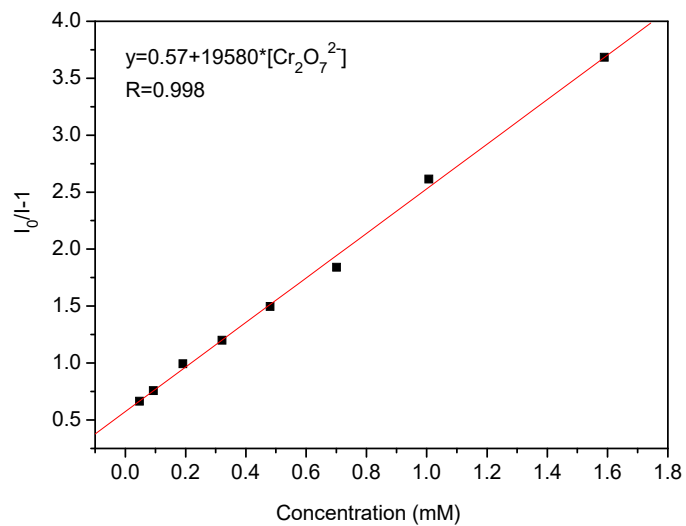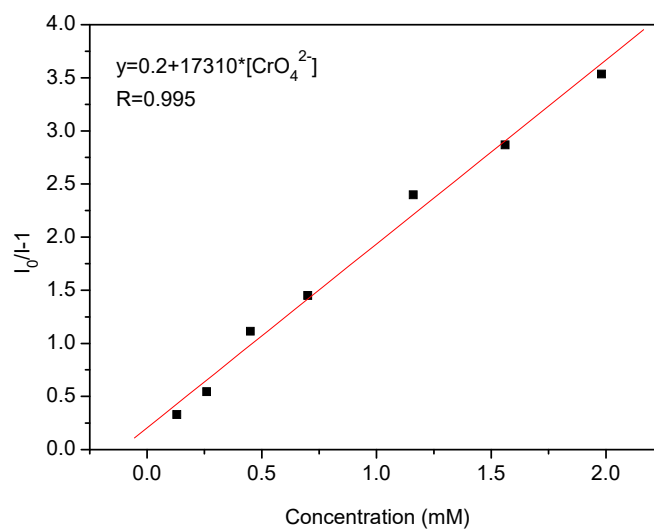

**Figure S14.** Effect of initial  $\text{Cr}_2\text{O}_7^{2-}$  (top) and  $\text{CrO}_4^{2-}$  (bottom) concentration on the adsorption capacity of PON-1.

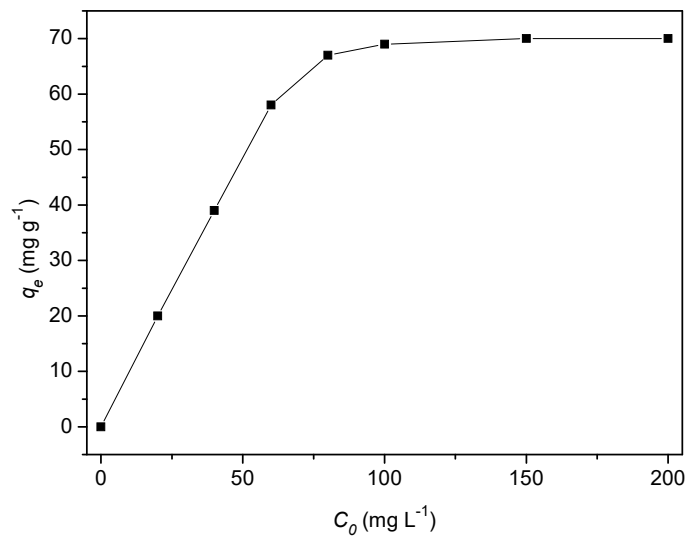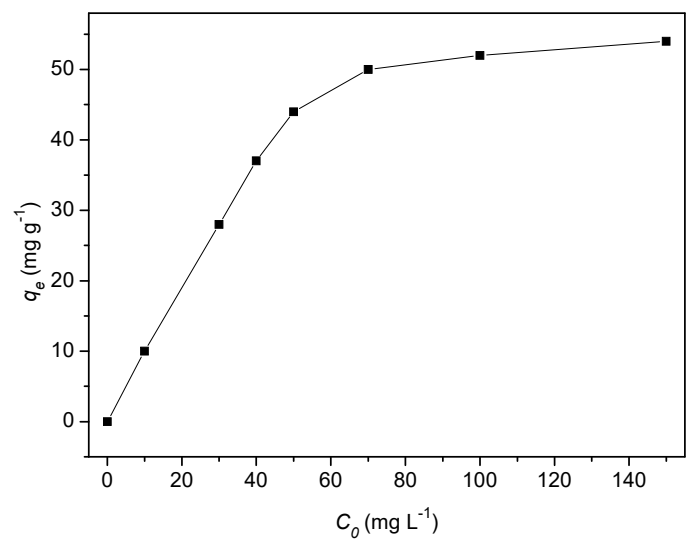

**Figure S15.** The adsorption capacity of PON-1 for  $\text{Cr}_2\text{O}_7^{2-}$  (top) and  $\text{CrO}_4^{2-}$  (bottom) with varying  $\text{Cr}_2\text{O}_7^{2-}$  and  $\text{CrO}_4^{2-}$  concentrations.

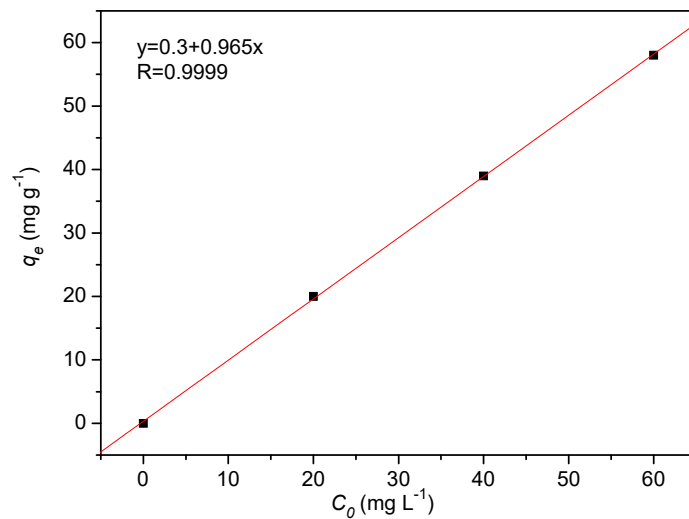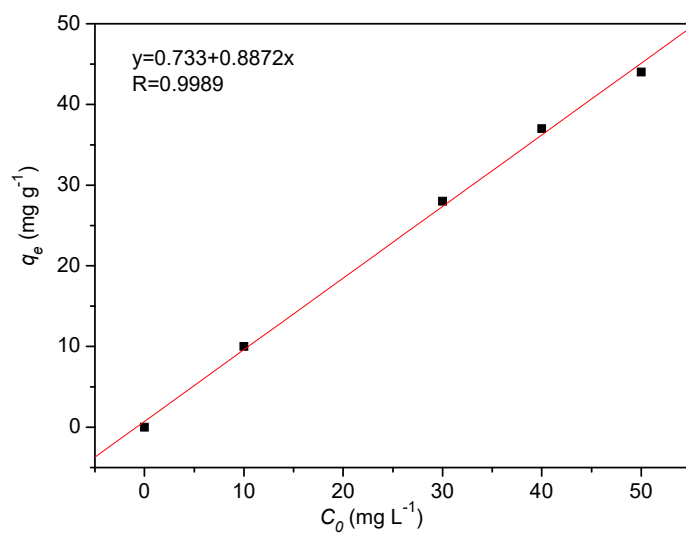

**Table S3.** Comparison of the detective sensitivity in various porous polymer for Cr(VI).

| No. | LMOF/LPON                                                                                                                                                                                                                                                                                 | Analyte                                      | $K_{sv}$ ( $M^{-1}$ )  | Detection limit           | Ref. |
|-----|-------------------------------------------------------------------------------------------------------------------------------------------------------------------------------------------------------------------------------------------------------------------------------------------|----------------------------------------------|------------------------|---------------------------|------|
| 1   | [Ni <sub>2</sub> (μ <sub>2</sub> -OH)(azdc)(tpim)]<br>(NO <sub>3</sub> )·6DMA·6MeOH                                                                                                                                                                                                       | Cr <sub>2</sub> O <sub>7</sub> <sup>2-</sup> | 1.31 × 10 <sup>4</sup> | 0.9 ppm                   | S1   |
|     |                                                                                                                                                                                                                                                                                           | CrO <sub>4</sub> <sup>2-</sup>               | 7.9 × 10 <sup>3</sup>  | 0.29 ppm                  |      |
| 2   | {[Zn(PA <sup>2-</sup> )(4,4'-bpy)](H <sub>2</sub> O)} <sub>n</sub>                                                                                                                                                                                                                        | Cr <sub>2</sub> O <sub>7</sub> <sup>2-</sup> | 4.8 × 10 <sup>3</sup>  | 4.12 μM                   | S2   |
| 3   | [Cd <sub>1.5</sub> (L <sub>1</sub> ) <sub>2</sub> (bpy)(NO <sub>3</sub> )]·2DMF·2H <sub>2</sub> O                                                                                                                                                                                         | Cr <sub>2</sub> O <sub>7</sub> <sup>2-</sup> | 5.42 × 10 <sup>4</sup> | 320 ppm                   | S3   |
|     |                                                                                                                                                                                                                                                                                           | CrO <sub>4</sub> <sup>2-</sup>               | 1.73 × 10 <sup>4</sup> | 280 ppm                   |      |
| 4   | [Cd(4- <i>tkpvb</i> )(5- <i>tert</i> -BIPA)] <sub>n</sub>                                                                                                                                                                                                                                 | Cr <sub>2</sub> O <sub>7</sub> <sup>2-</sup> | 4.68 × 10 <sup>4</sup> | 8.00 × 10 <sup>-8</sup> M | S4   |
|     |                                                                                                                                                                                                                                                                                           | CrO <sub>4</sub> <sup>2-</sup>               | 2.50 × 10 <sup>4</sup> | 1.20 × 10 <sup>-7</sup> M |      |
| 5   | {[Zn(IPA)(L <sub>8</sub> )]} <sub>n</sub>                                                                                                                                                                                                                                                 | Cr <sub>2</sub> O <sub>7</sub> <sup>2-</sup> | 1.37 × 10 <sup>3</sup> | 12.02 μM                  | S5   |
|     |                                                                                                                                                                                                                                                                                           | CrO <sub>4</sub> <sup>2-</sup>               | 1.00 × 10 <sup>3</sup> | 18.33 μM                  |      |
|     |                                                                                                                                                                                                                                                                                           | Cr <sub>2</sub> O <sub>7</sub> <sup>2-</sup> | 1.37 × 10 <sup>3</sup> | 12.02 μM                  |      |
|     |                                                                                                                                                                                                                                                                                           | CrO <sub>4</sub> <sup>2-</sup>               | 1.00 × 10 <sup>3</sup> | 18.33 μM                  |      |
| 6   | Zr-MOF-3<br>Hf-MOF-3                                                                                                                                                                                                                                                                      | Cr <sub>2</sub> O <sub>7</sub> <sup>2-</sup> | 6.37 × 10 <sup>5</sup> | 0.013 μM                  | S6   |
|     |                                                                                                                                                                                                                                                                                           | Cr <sub>2</sub> O <sub>7</sub> <sup>2-</sup> | 4.51 × 10 <sup>5</sup> | 0.019 μM                  |      |
| 7   | {[Eu(L <sub>9</sub> )(HCOO)]·H <sub>2</sub> O} <sub>n</sub>                                                                                                                                                                                                                               | Cr <sub>2</sub> O <sub>7</sub> <sup>2-</sup> | 3.1 × 10 <sup>4</sup>  | 2 × 10 <sup>-9</sup> M    | S7   |
|     |                                                                                                                                                                                                                                                                                           | CrO <sub>4</sub> <sup>2-</sup>               | 2.0 × 10 <sup>4</sup>  | 1 × 10 <sup>-9</sup> M    |      |
| 8   | {[Cd <sub>2</sub> (bptc)(4,4'-bipy)(H <sub>2</sub> O) <sub>2</sub> ]·4H <sub>2</sub> O} <sub>n</sub><br>{[Cd <sub>2</sub> (bptc)(2,2'-bipy) <sub>2</sub> (H <sub>2</sub> O) <sub>2</sub> ]} <sub>n</sub><br>{[Cd <sub>2</sub> (bptc)(phen) <sub>2</sub> ]·4H <sub>2</sub> O} <sub>n</sub> | Cr <sub>2</sub> O <sub>7</sub> <sup>2-</sup> | 9.34 × 10 <sup>3</sup> | 1.36 × 10 <sup>-5</sup> M | S8   |
|     |                                                                                                                                                                                                                                                                                           | CrO <sub>4</sub> <sup>2-</sup>               | 5.38 × 10 <sup>3</sup> | 1.6 × 10 <sup>-5</sup> M  |      |
|     |                                                                                                                                                                                                                                                                                           | Cr <sub>2</sub> O <sub>7</sub> <sup>2-</sup> | 1.17 × 10 <sup>4</sup> | 7.38 μM                   |      |
|     |                                                                                                                                                                                                                                                                                           | CrO <sub>4</sub> <sup>2-</sup>               | 7.95 × 10 <sup>3</sup> | 7.79 μM                   |      |
| 9   | [Eu <sub>2</sub> (tpbpc) <sub>4</sub> ·CO <sub>3</sub> ·4H <sub>2</sub> O]·DMF                                                                                                                                                                                                            | Cr <sub>2</sub> O <sub>7</sub> <sup>2-</sup> | 1.04 × 10 <sup>4</sup> | 1.07 ppm                  | S9   |
|     |                                                                                                                                                                                                                                                                                           | CrO <sub>4</sub> <sup>2-</sup>               | 4.85 × 10 <sup>3</sup> | 0.33 ppm                  |      |
| 10  | {[Zn <sub>3</sub> (mtrb) <sub>3</sub> (btc) <sub>2</sub> ]·3H <sub>2</sub> O} <sub>n</sub>                                                                                                                                                                                                | Cr <sub>2</sub> O <sub>7</sub> <sup>2-</sup> | 4.62 × 10 <sup>3</sup> | 2.83 μM                   | S10  |
|     |                                                                                                                                                                                                                                                                                           | CrO <sub>4</sub> <sup>2-</sup>               | 2.77 × 10 <sup>3</sup> | 4.52 μM                   |      |
| 11  | [Ag(CIP <sup>-</sup> )]                                                                                                                                                                                                                                                                   | Cr <sub>2</sub> O <sub>7</sub> <sup>2-</sup> | 6.3 × 10 <sup>4</sup>  | 1.4 × 10 <sup>-7</sup> M  | S11  |
|     |                                                                                                                                                                                                                                                                                           | CrO <sub>4</sub> <sup>2-</sup>               | 2 × 10 <sup>4</sup>    | 4.5 × 10 <sup>-7</sup> M  |      |
| 12  | ZR-1                                                                                                                                                                                                                                                                                      | Cr <sub>2</sub> O <sub>7</sub> <sup>2-</sup> | 8.94 × 10 <sup>3</sup> | 50 μM                     | S12  |
|     |                                                                                                                                                                                                                                                                                           | CrO <sub>4</sub> <sup>2-</sup>               | 1.11 × 10 <sup>4</sup> | —                         |      |
| 13  | [Cd(L <sub>4</sub> ) <sub>2</sub> (H <sub>2</sub> O) <sub>2</sub> ] <sub>n</sub>                                                                                                                                                                                                          | Cr <sub>2</sub> O <sub>7</sub> <sup>2-</sup> | 5.1 × 10 <sup>4</sup>  | 3.41 × 10 <sup>-5</sup> M | S13  |
|     |                                                                                                                                                                                                                                                                                           | CrO <sub>4</sub> <sup>2-</sup>               | 1.1 × 10 <sup>4</sup>  | 1.75 × 10 <sup>-4</sup> M |      |
| 14  | [Zn(opda)(bib)] <sub>n</sub>                                                                                                                                                                                                                                                              | Cr <sub>2</sub> O <sub>7</sub> <sup>2-</sup> | 1.54 × 10 <sup>7</sup> | 2.99 × 10 <sup>-7</sup> M | S14  |
| 15  | [Cd(2-bpeb) <sub>0.5</sub> (CNA)(H <sub>2</sub> O)] <sub>n</sub><br>[Cd(2-bpeb) <sub>0.5</sub> (NDC)] <sub>n</sub><br>[Zn(2-bpeb)(BDC)] <sub>n</sub>                                                                                                                                      | Cr <sub>2</sub> O <sub>7</sub> <sup>2-</sup> | 7.61 × 10 <sup>3</sup> | 3.67 × 10 <sup>-4</sup> M | S15  |
|     |                                                                                                                                                                                                                                                                                           | Cr <sub>2</sub> O <sub>7</sub> <sup>2-</sup> | 3.10 × 10 <sup>3</sup> | 9.20 × 10 <sup>-4</sup> M |      |
|     |                                                                                                                                                                                                                                                                                           | Cr <sub>2</sub> O <sub>7</sub> <sup>2-</sup> | 1.88 × 10 <sup>3</sup> | 1.44 × 10 <sup>-3</sup> M |      |
| 16  | TMU-41                                                                                                                                                                                                                                                                                    | Cr <sub>2</sub> O <sub>7</sub> <sup>2-</sup> | 1.00 × 10 <sup>6</sup> | 0.02 μM                   | S16  |
|     |                                                                                                                                                                                                                                                                                           | CrO <sub>4</sub> <sup>2-</sup>               | 6.10 × 10 <sup>5</sup> | 0.03 μM                   |      |
| 17  | [Zn(L <sub>6</sub> )(H <sub>2</sub> O)]·H <sub>2</sub> O                                                                                                                                                                                                                                  | Cr <sub>2</sub> O <sub>7</sub> <sup>2-</sup> | 2.07 × 10 <sup>4</sup> | 3.53 μM                   | S17  |
|     |                                                                                                                                                                                                                                                                                           | CrO <sub>4</sub> <sup>2-</sup>               | 1.02 × 10 <sup>4</sup> | 4.80 μM                   |      |
| 18  | [Pb(C <sub>20</sub> H <sub>10</sub> N <sub>2</sub> O <sub>4</sub> S)(DMF)]<br>[Mn <sub>4</sub> (C <sub>20</sub> H <sub>10</sub> N <sub>2</sub> O <sub>4</sub> S) <sub>2</sub> (HCOO) <sub>4</sub> (DEF) <sub>2</sub> ]                                                                    | Cr <sub>2</sub> O <sub>7</sub> <sup>2-</sup> | 1.12 × 10 <sup>5</sup> | 153 ppb                   | S18  |
|     |                                                                                                                                                                                                                                                                                           | CrO <sub>4</sub> <sup>2-</sup>               | 1.7 × 10 <sup>4</sup>  | 441 ppb                   |      |
|     |                                                                                                                                                                                                                                                                                           | Cr <sub>2</sub> O <sub>7</sub> <sup>2-</sup> | 1.21 × 10 <sup>5</sup> | 71 ppb                    |      |
|     |                                                                                                                                                                                                                                                                                           | CrO <sub>4</sub> <sup>2-</sup>               | 1.56 × 10 <sup>4</sup> | 303 ppb                   |      |
| 19  | [Zn(L <sub>11</sub> ) <sub>0.5</sub> (bidpe)] <sub>n</sub>                                                                                                                                                                                                                                | Cr <sub>2</sub> O <sub>7</sub> <sup>2-</sup> | 6.20 × 10 <sup>4</sup> | 4.80 × 10 <sup>-7</sup>   | S19  |
|     |                                                                                                                                                                                                                                                                                           | CrO <sub>4</sub> <sup>2-</sup>               | 5.54 × 10 <sup>4</sup> | 5.40 × 10 <sup>-7</sup>   |      |
| 20  | {[Zn(ATA)(L <sub>2</sub> )]·H <sub>2</sub> O} <sub>n</sub>                                                                                                                                                                                                                                | Cr <sub>2</sub> O <sub>7</sub> <sup>2-</sup> | 2.62 × 10 <sup>3</sup> | 4.30 × 10 <sup>-7</sup>   | S20  |
|     |                                                                                                                                                                                                                                                                                           | CrO <sub>4</sub> <sup>2-</sup>               | 1.48 × 10 <sup>3</sup> | 2.50 × 10 <sup>-7</sup>   |      |
| 21  | [Zn <sub>2</sub> (TPOM)(NH <sub>2</sub> -BDC) <sub>2</sub> ]·4H <sub>2</sub> O                                                                                                                                                                                                            | Cr <sub>2</sub> O <sub>7</sub> <sup>2-</sup> | 7.59 × 10 <sup>3</sup> | 3.9 μM                    | S21  |
|     |                                                                                                                                                                                                                                                                                           | CrO <sub>4</sub> <sup>2-</sup>               | 4.45 × 10 <sup>3</sup> | 4.8 μM                    |      |

|    |                                                                                                                                                        |                                |                                          |                               |           |
|----|--------------------------------------------------------------------------------------------------------------------------------------------------------|--------------------------------|------------------------------------------|-------------------------------|-----------|
| 22 | $[\{Zn_2(5N_3-IPA)_2(4,4'-azp)_2\}(H_2O)_8]_\infty$                                                                                                    | $Cr_2O_7^{2-}$<br>$CrO_4^{2-}$ | $5.87 \times 10^4$<br>$2.1 \times 10^4$  | 4 nM<br>11 nM                 | S22       |
| 23 | $[Tb_{0.2}Y_{0.8}(FDA)(Ox)_{0.5}(H_2O)_2] \cdot H_2O$                                                                                                  | $CrO_4^{2-}$                   | $3.46 \times 10^6$                       | 1.1 nM                        | S23       |
| 24 | $\{[(CH_3)_2NH_2]_2[Eu_4(FDA)_7(DMF)_2] \cdot 0.5DMF\}_n$<br>$\{[(CH_3)_2NH_2]_2[Tb_4(FDA)_7(DMF)_2] \cdot 0.5DMF\}_n$                                 | $Cr_2O_7^{2-}$                 | $1.25 \times 10^4$                       | $1.14 \times 10^{-4}$ M       | S24       |
|    |                                                                                                                                                        | $CrO_4^{2-}$                   | $3.56 \times 10^3$                       | $1.12 \times 10^{-4}$ M       |           |
| 24 |                                                                                                                                                        | $Cr_2O_7^{2-}$                 | $1.46 \times 10^4$                       | $7.42 \times 10^{-5}$ M       |           |
|    |                                                                                                                                                        | $CrO_4^{2-}$                   | $4.35 \times 10^3$                       | $1.27 \times 10^{-4}$ M       |           |
| 25 | $[Eu_7(mtb)_5(H_2O)_{16}] \cdot NO_3 \cdot 8DMA \cdot 18H_2O$                                                                                          | $CrO_4^{2-}$                   | $3.3 \times 10^4$                        | 0.56 ppb                      | S25       |
| 26 | $\{[Cd_2(L_{10})_2(adi)_2] \cdot 5H_2O\}_\infty$<br>$\{[Cd(L_{10})(glu)] \cdot 3H_2O\}_\infty$<br>$\{[Cd(L_{10})(sub)] \cdot 3H_2O \cdot DMA\}_\infty$ | $Cr_2O_7^{2-}$                 | $8.626 \times 10^3$                      | 1.126 ppm                     | S26       |
|    |                                                                                                                                                        | $Cr_2O_7^{2-}$                 | $1.027 \times 10^4$                      | 1.196 ppm                     |           |
|    |                                                                                                                                                        | $Cr_2O_7^{2-}$                 | $7.790 \times 10^3$                      | 0.831 ppm                     |           |
| 27 | $[Eu(ipbp)_2(H_2O)_3] \cdot Br \cdot 6H_2O$                                                                                                            | $Cr_2O_7^{2-}$<br>$CrO_4^{2-}$ | $8.98 \times 10^3$<br>$7.08 \times 10^3$ | 5.16 $\mu$ M<br>5.82 $\mu$ M  | S27       |
| 28 | $Zr_6O_4(OH)_7(H_2O)_3(BTBA)_3$                                                                                                                        | $Cr_2O_7^{2-}$                 | $1.57 \times 10^4$                       | 1.5 $\mu$ M                   | S28       |
| 29 | $\{[Cd_2(L_{11})(DCTP)_2] \cdot 3.75H_2O\}_n$                                                                                                          | $Cr_2O_7^{2-}$                 | $9.56 \times 10^3$                       | $1.99 \times 10^{-5}$ M       | S29       |
| 30 | $\{[(CH_3)_2NH_2]_2[Zn_5(TDA)_4(TZ)_4] \cdot 4DMF\}_n$                                                                                                 | $Cr_2O_7^{2-}$<br>$CrO_4^{2-}$ | $6.67 \times 10^3$<br>$5.48 \times 10^3$ | 7.48 $\mu$ M<br>14.46 $\mu$ M | S30       |
| 31 | $\{[Cd(L_7)(BPDC)] \cdot 2H_2O\}_n$<br>$\{[Cd(L_7)(SDBA)(H_2O)] \cdot 0.5H_2O\}_n$                                                                     | $Cr_2O_7^{2-}$                 | $6.40 \times 10^3$                       | $3.76 \times 10^{-5}$ M       | S31       |
|    |                                                                                                                                                        | $Cr_2O_7^{2-}$                 | $4.97 \times 10^3$                       | $4.86 \times 10^{-5}$ M       |           |
| 32 | $\{[Eu_3(bcbp)_3(NO_3)_7] \cdot NO_3 \cdot ClO_4\}_n$                                                                                                  | $Cr_2O_7^{2-}$                 | $1.40 \times 10^4$                       | 5.6 $\mu$ M                   | S32       |
| 33 | $\{[Eu_2(L_3)_{1.5}(H_2O)_2EtOH] \cdot DMF\}_n$                                                                                                        | $Cr_2O_7^{2-}$                 | $1.5 \times 10^3$                        | $10^{-5}$ M                   | S33       |
| 34 | RhB@9-1-MOF-253-NH <sub>2</sub>                                                                                                                        | $Cr_2O_7^{2-}$                 | —                                        | 0.863 $\mu$ M                 | S34       |
|    |                                                                                                                                                        | $CrO_4^{2-}$                   | —                                        | 0.789 $\mu$ M                 |           |
| 35 | COF-TT                                                                                                                                                 | $Cr_2O_7^{2-}$                 | $1.4 \times 10^4$                        | $3.43 \times 10^{-4}$ M       | S35       |
|    |                                                                                                                                                        | $CrO_4^{2-}$                   | $1.4 \times 10^4$                        | $3.43 \times 10^{-4}$ M       |           |
| 36 | POP-Im1                                                                                                                                                | $Cr_2O_7^{2-}$                 | n/a                                      | n/a                           | S36       |
| 37 | PON-1                                                                                                                                                  | $Cr_2O_7^{2-}$                 | $2.0 \times 10^4$                        | 0.35 $\mu$ M                  | This work |
|    |                                                                                                                                                        | $CrO_4^{2-}$                   | $1.78 \times 10^4$                       | 0.4 $\mu$ M                   |           |

## References:

- S1. R. Goswami, N. Seal, S. R. Dash, A. Tyagi and S. Neogi, *ACS Appl. Mater. Interfaces*, 2019, 11, 40134-40150.
- S2. H. Kaur, S. Sinha, V. Krishnan and R. R. Koner, *Ind. Eng. Chem. Res.*, 2020, 59, 8538-8550.
- S3. M. Singh, S. Senthilkumar, S. Rajput and S. Neogi, *Inorg. Chem.*, 2020, 59, 3012-3025.
- S4. W. J. Gong, R. Yao, H. X. Li, Z. G. Ren, J. G. Zhang and J. P. Lang, *Dalton Trans.*, 2017, 46, 16861-16871.
- S5. B. Parmar, Y. Rachuri, K. K. Bisht, R. Laiya and E. Suresh, *Inorg. Chem.*, 2017, 56, 2627-2638.
- S6. K. Wu, J. Zheng, Y.-L. Huang, D. Luo, Y. Y. Li, W. Lu and D. Li, *J. Mater. Chem. C*, 2020, 8, 16974-16983.
- S7. Y. Liu, J. Ma, C. Xu, Y. Yang, M. Xia, H. Jiang and W. Liu, *Dalton Trans.*, 2018, 47, 13543-13549.
- S8. Y. Lin, X. Zhang, W. Chen, W. Shi and P. Cheng, *Inorg. Chem.*, 2017, 56, 11768-11778.
- S9. J. Liu, G. Ji, J. Xiao and Z. Liu, *Inorg. Chem.*, 2017, 56, 4197-4205.
- S10. Y.-Q. Zhang, V. A. Blatov, T.-R. Zheng, C.-H. Yang, L.-L. Qian, K. Li, B.-L. Li and B. Wu, *Dalton Trans.*, 2018, 47, 6189-6198.
- S11. D.-D. Feng, Y.-D. Zhao, X.-Q. Wang, D.-D. Fang, J. Tang, L.-M. Fan and J. Yang, *Dalton Trans.*, 2019, 48, 10892-10900.
- S12. T.-T. Han, J. Yang, Y.-Y. Liu and J.-F. Ma, *Microporous Mesoporous Mater.*, 2016, 228, 275-288.
- S13. Y.-T. Yan, F. Cao, W.-Y. Zhang, S.-S. Zhang, F. Zhang and Y.-Y. Wang, *New J. Chem.*, 2018, 42, 9865-9875.
- S14. C. G. Xu, C. F. Bi, Z. Zhu, R. Luo, X. Zhang, D. M. Zhang, C. B. Fan, L. S. Cui and Y. H. Fan, *Crystengcomm*, 2019, 21, 2333-2344.
- S15. X.-D. Zhang, Y. Zhao, K. Chen, Y.-F. Jiang and W.-Y. Sun, *Chem.-Asian J.*, 2019, 14, 3620-3626.
- S16. N. Abdollahi and A. Morsali, *Anal. Chim. Acta.*, 2019, 1064, 119-125.
- S17. X.-Y. Guo, F. Zhao, J.-J. Liu, Z.-L. Liu and Y.-Q. Wang, *J. Mater. Chem. A*, 2017, 5, 20035-20043.
- S18. A. K. Jana and S. Natarajan, *ChemPlusChem*, 2017, 82, 1153-1163.



- S19. C. G. Xu, C. F. Bi, Z. Zhu, R. Luo, X. Zhang, D. M. Zhang, C. B. Fan, L. S. Cui and Y. H. Fan, *Crystengcomm*, 2019, 21, 2333-2344.
- S20. B. Parmar, Y. Rachuri, K. K. Bisht and E. Suresh, *Inorg. Chem.*, 2017, 56, 10939-10949.
- S21. R. Lv, J. Wang, Y. Zhang, H. Li, L. Yang, S. Liao, W. Gu and X. Liu, *J. Mater. Chem. A*, 2016, 4, 15494-15500.
- S22. S. Mukherjee, S. Ganguly, D. Samanta and D. Das, *ACS Sustainable Chem. Eng.*, 2020, 8, 1195-1206.
- S23. D. K. Singha, P. Majee, S. Hui, S. K. Mondal and P. Mahata, *Dalton Trans.*, 2020, 49, 829-840.
- S24. J.-Y. Zou, L. Li, S.-Y. You, Y.-W. Liu, H.-M. Cui, J.-Z. Cui and S.-W. Zhang, *Dalton Trans.*, 2018, 47, 15694-15702.
- S25. W. Liu, Y. Wang, Z. Bai, Y. Li, Y. Wang, L. Chen, L. Xu, J. Diwu, Z. Chai and S. Wang, *ACS Appl. Mater. Interfaces*, 2017, 9, 16448-16457.
- S26. Y.-Q. Chen, Y. Tian, S.-L. Yao, J. Zhang, R.-Y. Feng, Y.-J. Bian and S.-J. Liu, *Chem.-Asian J.*, 2019, 14, 4420-4428.
- S27. C. Zhang, L. Sun, Y. Yan, H. Shi, B. Wang, Z. Liang and J. Li, *J. Mater. Chem. C*, 2017, 5, 8999-9004.
- S28. T. He, Y.-Z. Zhang, X.-J. Kong, J. Yu, X.-L. Lv, Y. Wu, Z.-J. Guo and J.-R. Li, *ACS Appl. Mater. Interfaces*, 2018, 10, 16650-16659.
- S29. Y.-S. Shi, D. Liu, L. Fu, Y.-H. Li and G.-Y. Dong, *CrystEngComm*, 2020, 22, 4079-4093.
- S30. J.-Y. Zou, L. Li, S.-Y. You, H.-M. Cui, Y.-W. Liu, K.-H. Chen, Y.-H. Chen, J.-Z. Cui and S.-W. Zhang, *Dyes Pigm.*, 2018, 159, 429-438.
- S31. S. Chen, Z. Shi, L. Qin, H. Jia and H. Zheng, *Cryst. Growth Des.*, 2017, 17, 67-72.
- S32. Z. Li, W. Cai, X. Yang, A. Zhou, Y. Zhu, H. Wang, X. Zhou, K. Xiong, Q. Zhang and Y. Gai, *Cryst. Growth Des.*, 2020, 20, 3466-3473.
- S33. W. Liu, X. Huang, C. Xu, C. Chen, L. Yang, W. Dou, W. Chen, H. Yang and W. Liu, *Chem.-Eur. J.*, 2016, 22, 18769-18776.
- S34. Y. Jin, H. Lu and B. Yan, *Dyes Pigments*, 2021, 194, 109588.
- S35. M. Li, Z. H. Cui, S. R. Pang, L. K. Meng, D. X. Ma, Y. Li, Z. Shi and S. H. Feng, *J. Mater. Chem. C*, 2019, 7, 11919-11925.
- S36. Y. Su, Y. Wang, X. Li, X. Li and R. Wang, *ACS Appl. Mater. Interfaces*, 2016, 8, 18904.
